# Supplementary material for: Low Prevalence of Toxoplasma gondii in Sheep and Isolation of a Viable Strain from Edible Mutton from Central China
Source: MDPI journal article supplement (doi:10.3390/pathogens12060827), 2023-06-14
Supplement: s1 [file s1]

## Supplementary materials

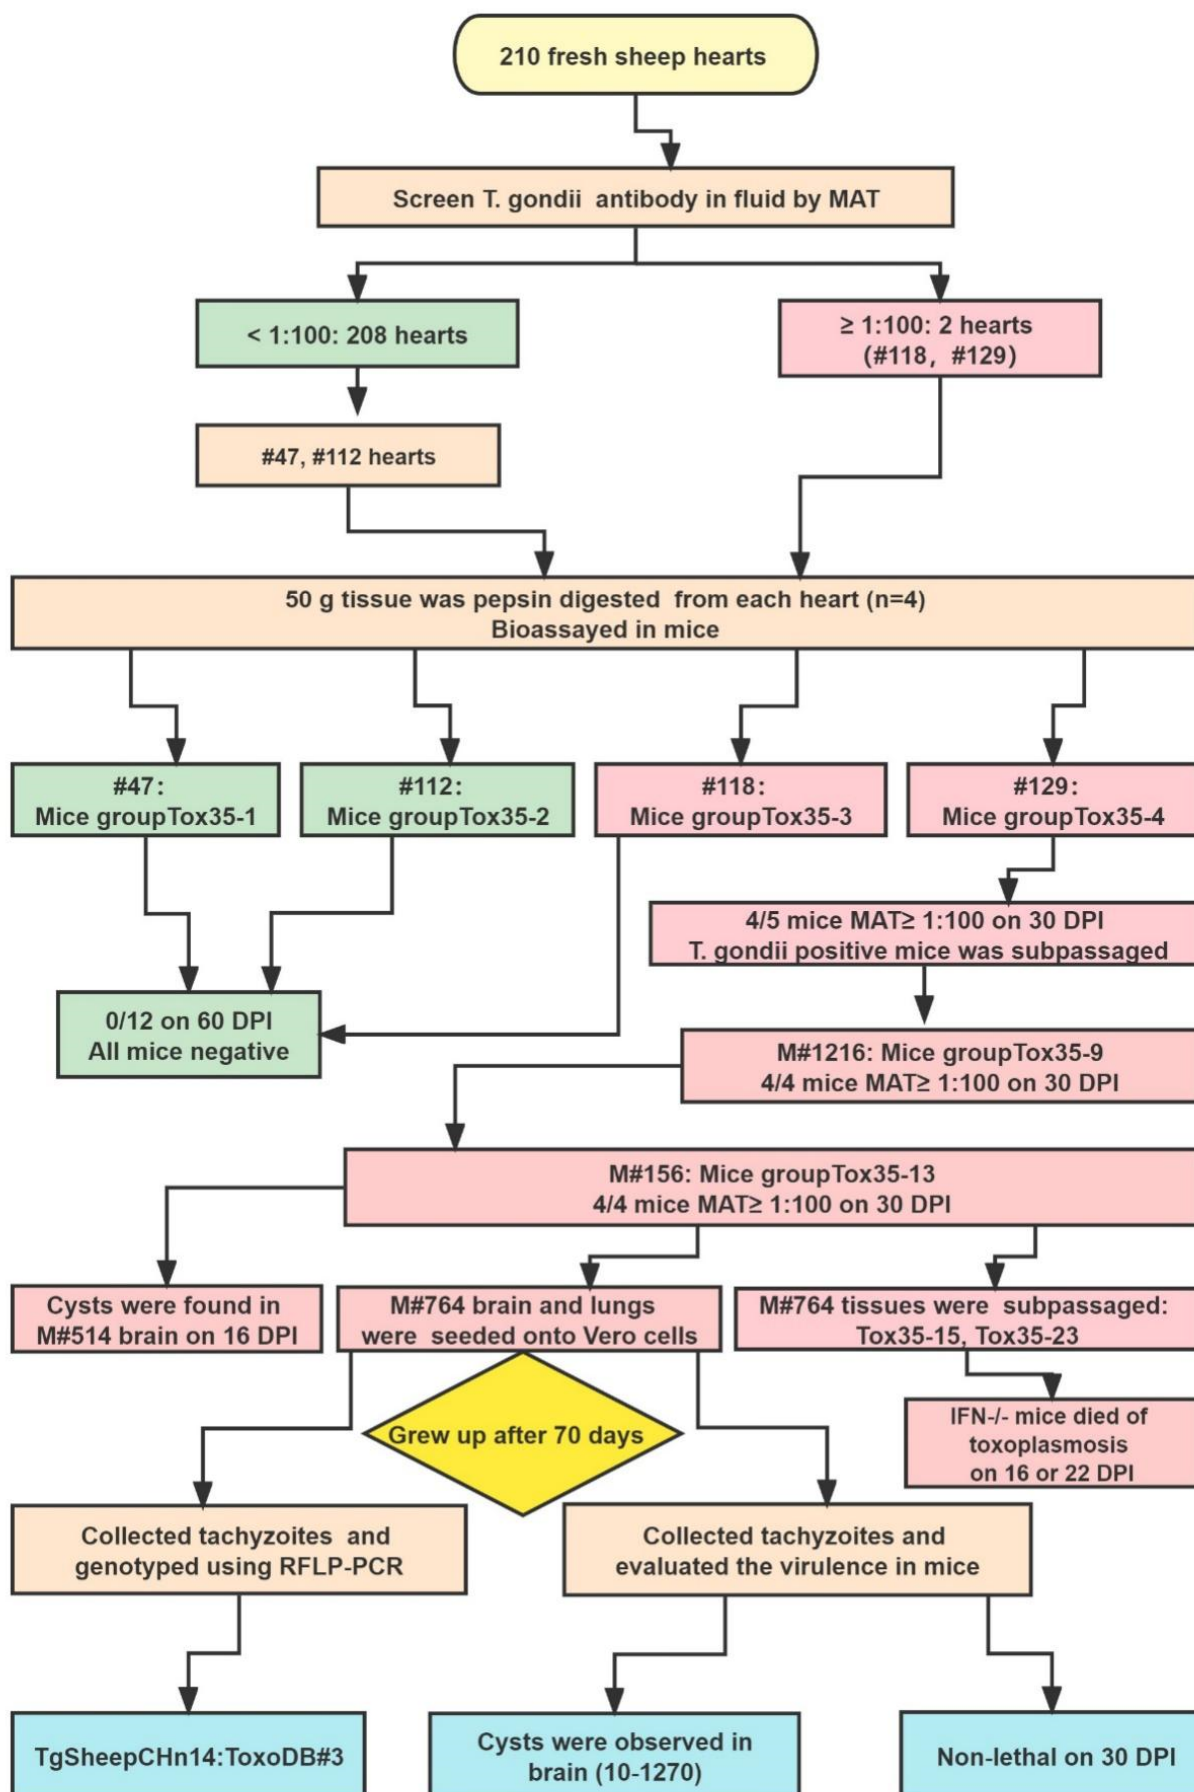

Figure S1. Flow chart for sheep infected *Toxoplasma gondii* assay procedure.

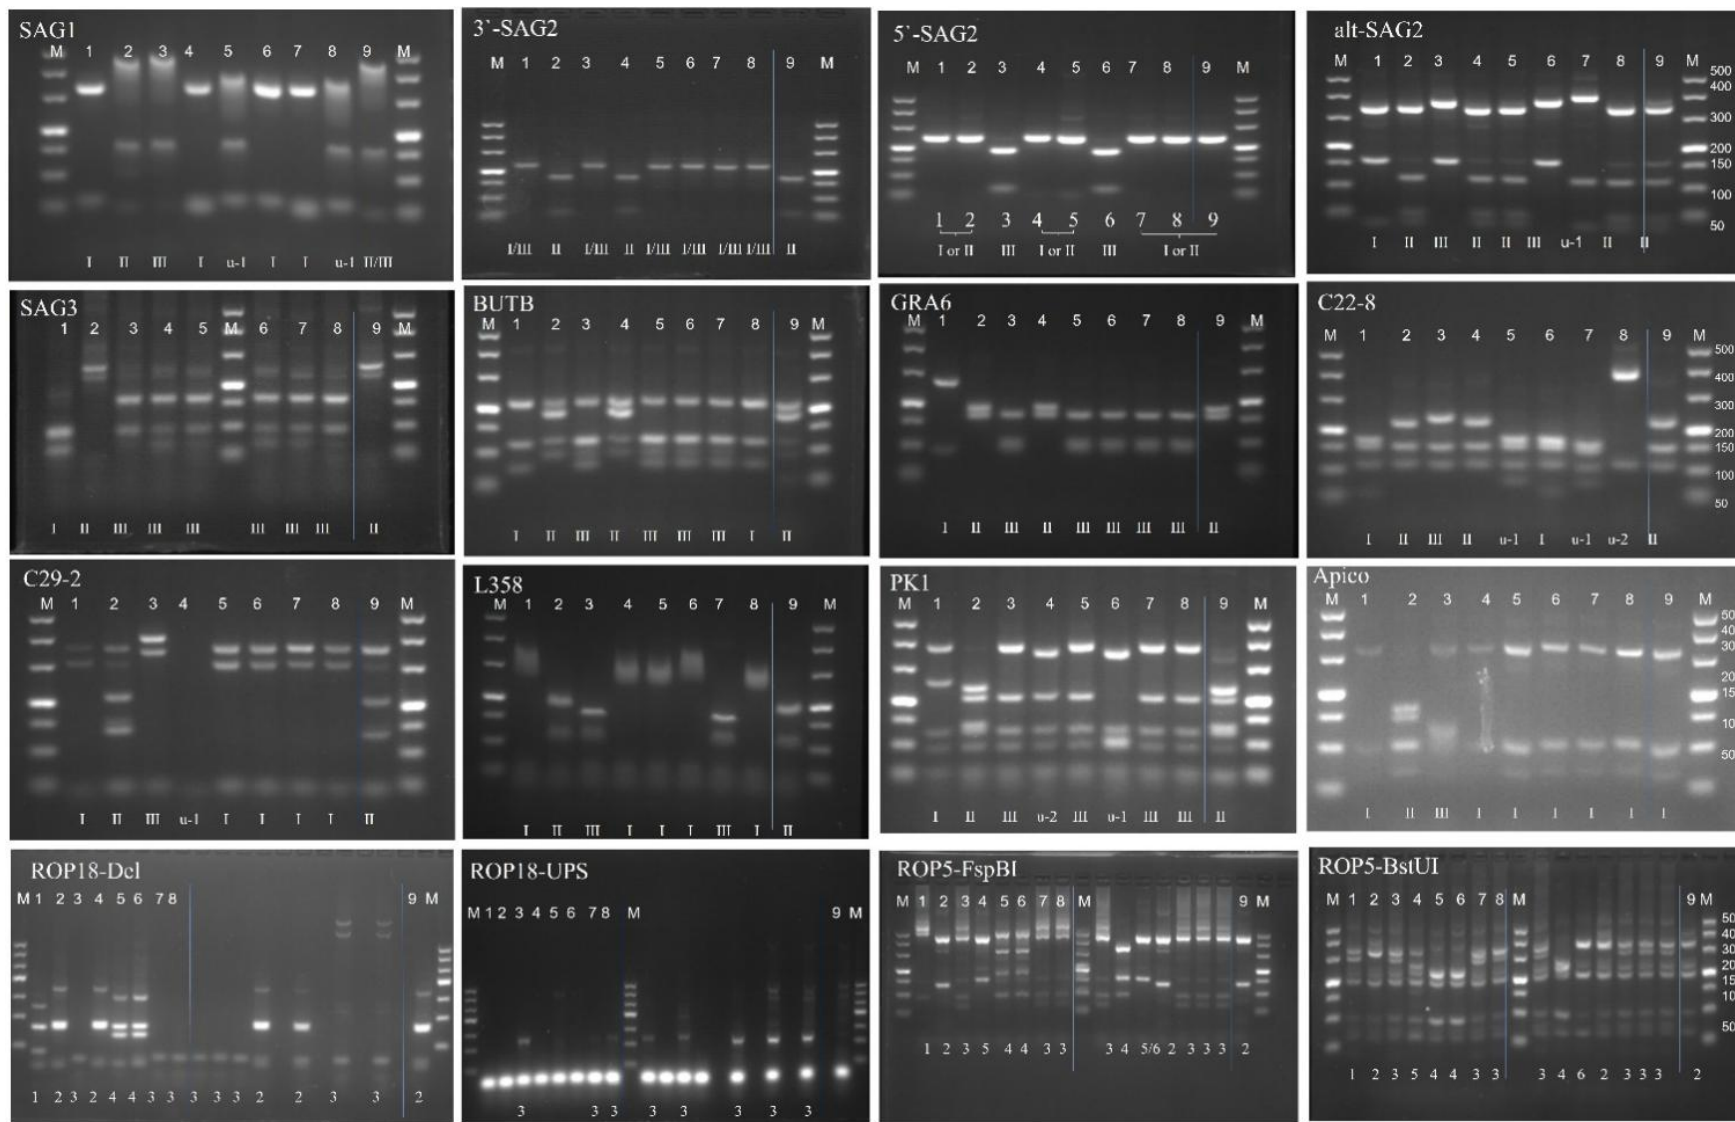

**Figure S2. Genotyping of *Toxoplasma gondii* isolated strains from sheep.**  
 1:GT1, 2: PTG, 3: CTG, 4: TgCgCal, 5: MAS, 6: TgCatBr5, 7: TgCatBr64, 8: TgToucan (TgRsCr1),  
 9: TgSheepCHn14, M: markers.

**Table S1 Summary of viable *Toxoplasma gondii* isolates from animals and human in China (n = 169)**

| Province                                            | species                | No. of animls | Seroprevalence          | Bioassay of tissues <sup>b</sup> |          |                                                                                                                                            | Genotype ToxoDB #                      | References |
|-----------------------------------------------------|------------------------|---------------|-------------------------|----------------------------------|----------|--------------------------------------------------------------------------------------------------------------------------------------------|----------------------------------------|------------|
|                                                     |                        |               | Test, cut-off titer (%) | Number                           | Positive | Strain ID                                                                                                                                  |                                        |            |
| Beijing                                             | Stray cat              | 64            | MAT, 20 (58)            | 23                               | 11       | TgCatBj1-11                                                                                                                                | All #9                                 | [1]        |
| Anhui (22), Hubei (23), Guangdong (20), Shanxi (24) | cat                    | 211           | ND                      | 89                               | 14       | TgCtys1,2<br>TgCtwh1-8, TgCtgd1,2<br>TgCtsx1,2                                                                                             | 12 #9, 2 #205                          | [2]        |
| ND                                                  | Human cat              | ND            | ND                      | ND                               | 23       | TgHuZSE, TgHuZS2, TgHuAh1-2, TgCtwh9-12,14,19<br>TgCtxz1-8, TgCtsd1-5                                                                      | 15 #9, 2 #10, 1 #1, 1 #204, 4 #205     | [3]        |
| Guizhou (23+17), Anhui (24), Hubei (13)             | Cat,Pig, Chicken,vole  | 77            | ND                      | B                                | 11       | TgCtgy1-5, TgCtgy1-4<br>TgCksz1, TgVowh1                                                                                                   | 10 #9, 1 #205                          | [4]        |
| Guangdong                                           | Market cat             | 34            | MAT, 40(79)             | 27                               | 17       | TgCtPRC1-17                                                                                                                                | 2#18, 15#9                             | [5]        |
| Guangdong                                           | Human, Pig, Cat, Sheep | ND            | ND                      | ND                               | 17       | SH, CN,NT, TgC1-TgC8<br>GYS,PYS,ZC,ZS,ZS1,QHO                                                                                              | 3 #10, 1 #3, 12 #9, 1 # MIX            | [6]        |
| Shanghai                                            | rabbit                 | 77            | MAT,25(23)              | 18                               | 1        | SHR                                                                                                                                        | SAG2, SAG3, GRA6, BTUB<br>All type III | [7]        |
| Liaoning                                            | pig                    | 2063          | MAT,25(11.3)            | 233                              | 23       | TgPigCn3-2, 3-12, 5-5,5-6,5-7, 8-16, 8-18,10-34,14-56,19-24, 22-10,27-8, 29-5, 33-6,40-10, 58-14, 61-11,69-2, 69-14,77-2,80-11,80-25,80-27 | 1#3, 1#3 or #1, 13#9                   | [8]        |
| Kunming                                             | feline feces           | 115           | Morphology, (4)         | ND                               | 1        | KM isolate                                                                                                                                 | type II                                | [9]        |
| Guizhou                                             | Pig, cat               | 70+19         | ELISA, (49+12)          | ND                               | 5        | TGGZ1-3(pig), TGGZ4-5(cat)                                                                                                                 | All #9                                 | [10]       |
| Jiangsu                                             | human fetus pigs       | ND            | ND                      | ND                               | 3        | KS, YZ-1, YZ-2                                                                                                                             | 1 #10, 2#9                             | [11-12]    |
| Henan , Zhejiang                                    | Stray cat, pet cat     | 42            | MAT, 100(50)            | 42                               | 8+1=9    | TgCatCHn1-3, TgCatCZg1-5<br>TgCatCHn4 (feces)                                                                                              | 6 #9, 1 #1, 1 #2, 1 #17                | [13]       |
| Henan                                               | Hospital cat           | 28            | MAT,25(7)               | 8,                               | 1        | TgCatCHn5                                                                                                                                  | #9, 1                                  | [14]       |
| Henan                                               | Sheep                  | 840           | MAT,25(20.7)            | 26                               | 2        | TgSheepHn1-2                                                                                                                               | All #9                                 | [15]       |
| Henan                                               | Sheep                  | 166           | MAT,100(25)             | 67                               | 11       | TgSheepHn3-13                                                                                                                              | 7 #2, 4 #4                             | [16]       |
| Henan                                               | Sheep                  | 224           | MAT,100(1.8)            | 4                                | 1        | TgSheepHn14                                                                                                                                | #3                                     | This study |
| Henan                                               | Kangaroo               | 4             | MAT,25(75)              | 4                                | 1        | TgRooCHn1                                                                                                                                  | #292                                   | [17]       |
| Henan                                               | Kangaroo               | 3             | MAT,25(67)              | 3                                | 2        | TgRooCHn2-3                                                                                                                                | #3, #2                                 | [18]       |
| Henan                                               | Kangaroo               | 26            | MAT,25(50)              | 6                                | 1        | TgRooCHn4                                                                                                                                  | #3                                     | [19]       |
| Henan                                               | Red panda              | 14            | MAT,25(14)              | 8                                | 1        | TgRedpandaCHn1                                                                                                                             | #20                                    | [20]       |
| Henan                                               | Serval                 | 1             | MAT,25(100)             | 1                                | 1        | TgServalCHn1                                                                                                                               | #20                                    | [21]       |

|       |                                                                                                         |    |             |   |   |                 |          |                                |
|-------|---------------------------------------------------------------------------------------------------------|----|-------------|---|---|-----------------|----------|--------------------------------|
| Henan | Tiger                                                                                                   | 10 | MAT,25(80)  | 6 | 2 | TgTigerCHn1-2   | All #9   | [22]                           |
| Henan | Tiger                                                                                                   | 4  | MAT,25(100) | 4 | 2 | TgTigerCHn3-4   | #20, #2  | [23]                           |
| Henan | Caracal                                                                                                 | 2  | MAT,25(100) | 2 | 1 | TgCaracalCHn1   | #2       | [24]                           |
| Henan | Caracal                                                                                                 | 1  | MAT,25(100) | 1 | 1 | TgCaracalCHn2   | #5       | Ren HJ et al.,<br>unpublished  |
| Henan | White<br>spoonbills                                                                                     | 7  | MAT,4(29)   | 2 | 1 | TgSpoonbillCHn1 | #2       | [25]                           |
| Henan | Monkey                                                                                                  | 15 | MAT,8(47)   | 9 | 1 | TgMonkeyCHn1    | Mix      | [26]                           |
| Henan | Monkey                                                                                                  | 13 | MAT,8(62)   | 9 | 1 | TgMonkeyCHn2    | #9       | Yang LL et al.,<br>unpublished |
| Henan | Monkey                                                                                                  | 9  | MAT,8(22)   | 3 | 1 | TgMonkeyCHn3    | #6       | Ma YH et al.,<br>unpublished   |
| Henan | Cheetah                                                                                                 | 6  | MAT,25(100) | 6 | 2 | TgCheetahCHn1-2 | #319, #9 | Zhu NP et al.,<br>unpublished  |
| Henan | Fur seal                                                                                                | 4  | MAT,25(50)  | 4 | 1 | TgfursealCHn1   | #5       | Mao GH et al.,<br>unpublished  |
| Total | 110 #9, 12 #2, 7 #205, 6 #10, 6 #3, 4 #4, 3 #20, 2 #1, 2 #18, 2 #5, 1 #6, 1 #204, 1 #17, 1 #292, 1 #319 |    |             |   |   |                 |          |                                |

ND: experiment not done;

MAT: modified agglutination test;

ELISA: enzyme-linked immunosorbent assay.

Table S2 Raw data about the number of *Toxoplasma gondii* TgSheepCHn14 brain cysts and survival time in mice.

| Survival time<br>Brain cysts | <30 days | 30-60 days | >60 days |
|------------------------------|----------|------------|----------|
| 1                            | 1190     | 760        | 400      |
| 2                            | 70       | 160        | 130      |
| 3                            | 1270     | 190        | 360      |
| 4                            | 500      | 680        | 180      |
| 5                            | 1140     |            | 370      |
| 6                            | 1000     |            | 90       |
| 7                            |          |            | 60       |
| 8                            |          |            | 10       |
| 9                            |          |            | 110      |
| 10                           |          |            | 450      |
| 11                           |          |            | 40       |
| 12                           |          |            | 260      |
| 13                           |          |            | 350      |
| 14                           |          |            | 420      |
| 15                           |          |            | 570      |
| 16                           |          |            | 10       |
| M±SE                         | 862±194  | 448±158    | 238±45   |

## References

1. Qian, W.; Wang, H.; Su, C.; Shan, D.; Cui, X.; Yang, N.; Lv, C.; Liu, Q. Isolation and characterization of *Toxoplasma gondii* strains from stray cats revealed a single genotype in Beijing, China. *Vet Parasitol.* **2012**, *187*(3-4), 408–413.
2. Chen, Z.W.; Gao, J.M.; Huo, X.X.; Wang, L.; Yu, L.; Halm-Lai, F.; Xu, Y.H.; Song, W.J.; Hide, G.; Shen, J.L.; Lun, Z.R. Genotyping of *Toxoplasma gondii* isolates from cats in different geographic regions of China. *Vet Parasitol.* **2011**, *183*(1-2), 166–70.
3. Wang, L.; Chen, H.; Liu, D.; Huo, X.; Gao, J.; Song, X.; Xu, X.; Huang, K.; Liu, W.; Wang, Y.; Lu, F.; Lun, Z.R.; Luo, Q.; Wang, X.; Shen, J. Genotypes and mouse virulence of *Toxoplasma gondii* isolates from animals and humans in China. *PLoS One.* **2013**, *8*(1), e53483.
4. Wang, L.; Cheng, H.W.; Huang, K.Q.; Xu, Y.H.; Li, Y.N.; Du, J.; Yu, L.; Luo, Q.L.; Wei, W.; Jiang, L.; Shen, J.L. *Toxoplasma gondii* prevalence in food animals and rodents in different regions of China: isolation, genotyping and mouse pathogenicity. *Parasit Vectors.* **2013**, *6*, 273.
5. Dubey, J.P.; Zhu, X.Q.; Sundar, N.; Zhang, H.; Kwok, O.C.; Su, C. Genetic and biologic characterization of *Toxoplasma gondii* isolates of cats from China. *Vet Parasitol.* **2007**, *145*(3-4), 352–356.
6. Zhou, P.; Zhang, H.; Lin, R.Q.; Zhang, D.L.; Song, H.Q.; Su, C.; Zhu, X.Q. Genetic characterization of *Toxoplasma gondii* isolates from China. *Parasitol Int.* **2009**, *58*(2), 193–195.
7. Zhou, Y.; Zhang, H.; Cao, J.; Gong, H.; Zhou, J. Isolation and genotyping of *Toxoplasma gondii* from domestic rabbits in China to reveal the prevalence of type III strains. *Vet Parasitol.* **2013**, *193*(1-3), 270–276.
8. Wang, D.; Liu, Y.; Jiang, T.; Zhang, G.; Yuan, G.; He, J.; Su, C.; Yang, N. Seroprevalence and genotypes of *Toxoplasma gondii* isolated from pigs intended for human consumption in Liaoning province, northeastern China. *Parasit Vectors.* **2016**, *9*, 248.
9. Liang, Y.; Chen, J.; Meng, Y.; Zou, F.; Hu, J.; Esch, G.W. Occurrence and genetic characterization of GRA6 and SAG2 from *Toxoplasma gondii* oocysts in cat feces, Kunming, China. *Southeast Asian J Trop Med Public Health.* **2016**, *47*(6), 1134–1142.
10. Li, Y.N.; Nie, X.; Peng, Q.Y.; Mu, X.Q.; Zhang, M.; Tian, M.Y.; Min, S.J. Seroprevalence and genotype of *Toxoplasma gondii* in pigs, dogs and cats from Guizhou province, Southwest China. *Parasit Vectors.* **2015**, *8*, 214.
11. Hou, Z.; Zhou, Y.; Liu, D.; Su, S.; Zhao, Z.; Xu, J.; Tao, J. Genotyping and virulence analysis of *Toxoplasma*

- gondii* isolates from a dead human fetus and dead pigs in Jiangsu province, Eastern China. *Acta Parasitol.* **2018**, 63(2), 397–411.
12. Zhang, W.; Liu, J.S.; Ma, Y.W.; Lu, S. *Toxoplasma gondii* isolated from a dead deformed fetus. *Chinese Journal of Zoonoses*, **1987**, 3, 26 (in Chinese).
  13. Yang, Y.; Ying, Y.; Verma, S.K.; Cassinelli, A.B.; Kwok, O.C.; Liang, H.; Pradhan, A.K.; Zhu, X.Q.; Su, C.; Dubey, J.P. Isolation and genetic characterization of viable *Toxoplasma gondii* from tissues and feces of cats from the central region of China. *Vet Parasitol.* **2015**, 211(3-4), 283–288.
  14. Yang, Y.R.; Feng, Y.J.; Lu, Y.Y.; Dong, H.; Li, T.Y.; Jiang, Y.B.; Zhu, X.Q.; Zhang, L.X. Antibody detection, isolation, genotyping, and virulence of *Toxoplasma gondii* in captive felids from China. *Front Microbiol.* **2017**, 8, 1414.
  15. Yang, Y.; Feng, Y.; Yao, Q.; Wang, Y.; Lu, Y.; Liang, H.; Zhu, X.; Zhang, L. Seroprevalence, isolation, genotyping, and pathogenicity of *Toxoplasma gondii* strains from sheep in China. *Front Microbiol.* **2017**, 8, 136.
  16. Jiang, N.; Su, R.; Jian, F.; Su, C.; Zhang, L.; Jiang, Y.; Yang, Y. *Toxoplasma gondii* in lambs of China: heart juice serology, isolation and genotyping. *Int J Food Microbiol.* **2020**, 322, 108563.
  17. Su, R.; Dong, H.; Li, T.; Jiang, Y.; Yuan, Z.; Su, C.; Zhang, L.; Yang, Y. *Toxoplasma gondii* in four captive kangaroos (*Macropus* spp.) in China: Isolation of a strain of a new genotype from an eastern grey kangaroo (*Macropus giganteus*). *Int J Parasitol Parasites Wildl.* **2019**, 8, 234–239.
  18. Yang, L.; Xin, S.; Zhu, N.; Li, J.; Su, C.; Yang, Y. Two viable *Toxoplasma gondii* isolates from red-necked wallaby (*Macropus rufogriseus*) and red kangaroo (*M. rufus*). *Parasitol Int.* **2023**, 92, 102687.
  19. Yang, L.; Ren, H.; Zhu, N.; Mao, G.; Li, J.; Su, C.; Jiang, Y.; Yang, Y. Epidemiology and isolation of viable *Toxoplasma gondii* strain from macropods. *Heliyon.* **2023**, 9(3), e13960.
  20. Yang, Y.; Dong, H.; Su, R.; Li, T.; Jiang, N.; Su, C.; Zhang, L. Evidence of red panda as an intermediate host of *Toxoplasma gondii* and *Sarcocystis* species. *Int J Parasitol Parasites Wildl.* **2019**, 8, 188–191.
  21. Dong, H.; Su, R.; Li, T.; Su, C.; Zhang, L.; Yang, Y. Isolation, genotyping and pathogenicity of a *Toxoplasma gondii* strain isolated from a Serval (*Leptailurus serval*) in China. *Transbound Emerg Dis.* **2019**, 66(4), 1796–1802.
  22. Yang, Y.; Dong, H.; Su, R.; Jiang, N.; Li, T.; Su, C.; Yuan, Z.; Zhang, L. Direct evidence of an extra-intestinal cycle of *Toxoplasma gondii* in tigers (*Panthera tigris*) by isolation of viable strains. *Emerg. Microbes Infect.* **2019**, 8(1), 1550–1552.

23. Ren, H.; Yang, L.; Zhu, N.; Li, J.; Su, C.; Jiang, Y.; Yang, Y. Additional evidence of tigers (*Panthera tigris altaica*) as intermediate hosts for *Toxoplasma gondii* through the isolation of viable strains. *Int J Parasitol Parasites Wildl.* **2022**, *19*, 330–335.
24. Jiang, N.; Xin, S.; Li, J.; Su, C.; Zhang, L.; Yang, Y. Isolation and characterization of *Toxoplasma gondii* from captive caracals (*Caracal caracal*). *Int J Parasitol Parasites Wildl.* **2020**, *13*, 196–201.
25. Yang, Y.; Jiang, N.; Xin, S.; Zhang, L. *Toxoplasma gondii* infection in white spoonbills (*Platalea leucorodia*) from Henan Province, China. *Emerg Microbes Infect.* **2020**, *9(1)*, 2619–2621.
26. Xin, S.; Jiang, N.; Yang, L.; Zhu, N.; Huang, W.; Li, J.; Zhang, L.; Su, C.; Yang, Y. Isolation, genotyping and virulence determination of a *Toxoplasma gondii* strain from non-human primate from China. *Transbound Emerg Dis.* **2022**, *69(2)*, 919–925.
